# Supplementary material for: Unusual binding modes in the copper(ii) and palladium(ii) complexes of peptides containing both histidyl and cysteinyl residues
Source: Royal Society of Chemistry journal article supplement (doi:10.1039/c6nj03735f), 2017-01-01

## Electronic Supplementary Information

### Unusual binding modes in the copper(II) and palladium(II) complexes of peptides containing both histidyl and cysteinyl residues

*Norbert Lihí<sup>a</sup>, Daniele Sanna<sup>b</sup>, István Bányai<sup>c</sup>, Katalin Várnagy<sup>a</sup>, Imre Sóvágó<sup>a</sup>*

*<sup>a</sup>Department of Inorganic and Analytical Chemistry, University of Debrecen, H-4032  
Debrecen, Hungary*

*<sup>b</sup>Istituto CNR di Chimica Biomolecolare, U. O. S. Sassari, trav. La Crucca 3, I-07040 Li  
Punti, Sassari, Italy*

*<sup>c</sup>Department of Physical Chemistry, University of Debrecen, H-4032 Debrecen, Hungary*

## Figure Captions

**Figure S1.** Circular dichroism spectra recorded in the Cu(II):AAHAAC-NH<sub>2</sub> 1:1 system.  $c_L = 2$  mM.

**Figure S2.** Calculated ECD spectra and optimized structure of the different PdLH<sub>1</sub> complexes, L = AAHAAC-NH<sub>2</sub>.

**Figure S3.** EPR spectra of Cu(II):AHAAAC-NH<sub>2</sub> 1:1 at pH 7.93.

**Figure S4.** Concentration distribution curve of the complexes formed in the Pd(II):AHAAAC-NH<sub>2</sub> 1:1 system. The stepwise protonation constants are also marked.  $c_L = 2$  mM.

**Figure S5.** pH-dependent CD spectra recorded in the Pd(II):AHAAAC-NH<sub>2</sub> 1:1 system.

**Figure S6.** Calculated ECD spectrum of the MLH<sub>1</sub> complex formed in the Pd(II):AHAAAC-NH<sub>2</sub> system.

**Figure S1.** Circular dichroism spectra recorded in the Cu(II):AAHAAC-NH<sub>2</sub> 1:1 system.  $c_L = 2$  mM.

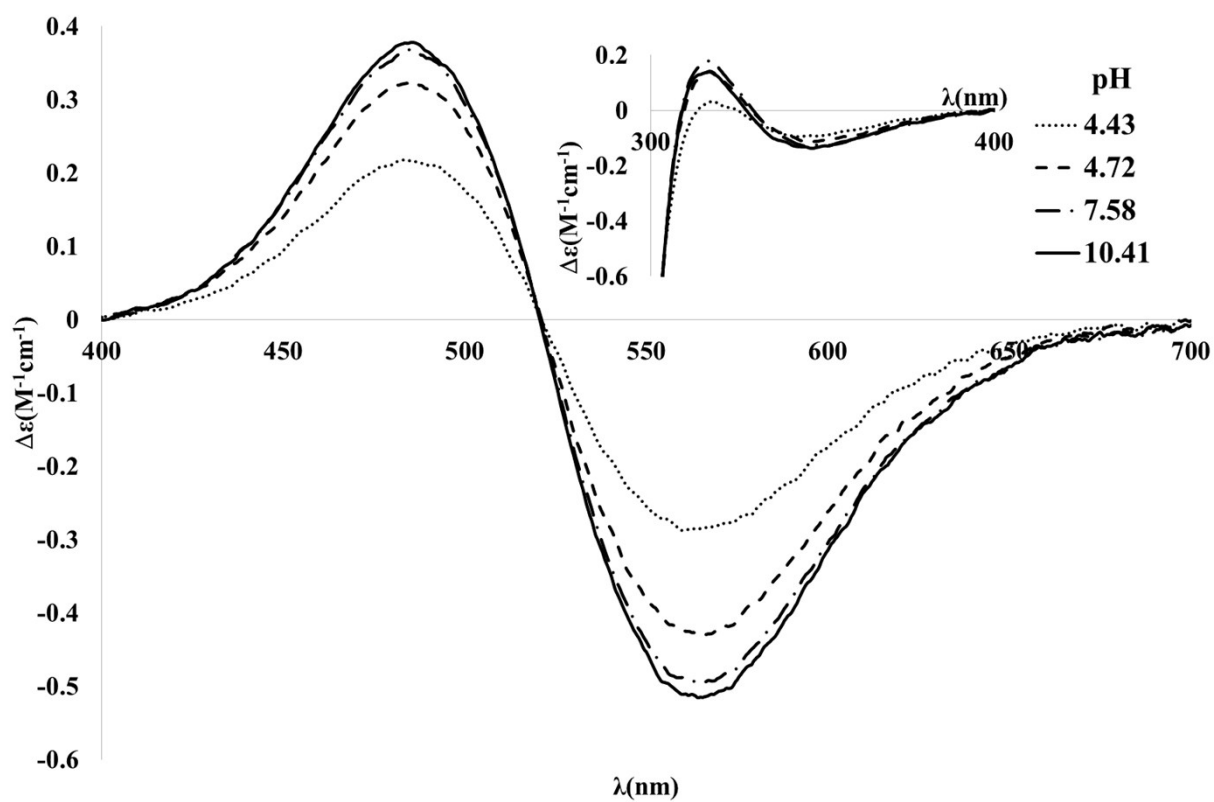

**Figure S2.** Calculated ECD spectra and optimized structure of the different PdLH<sub>1</sub> complexes, L = AAHAAC-NH<sub>2</sub>.

*N(2) coordination*

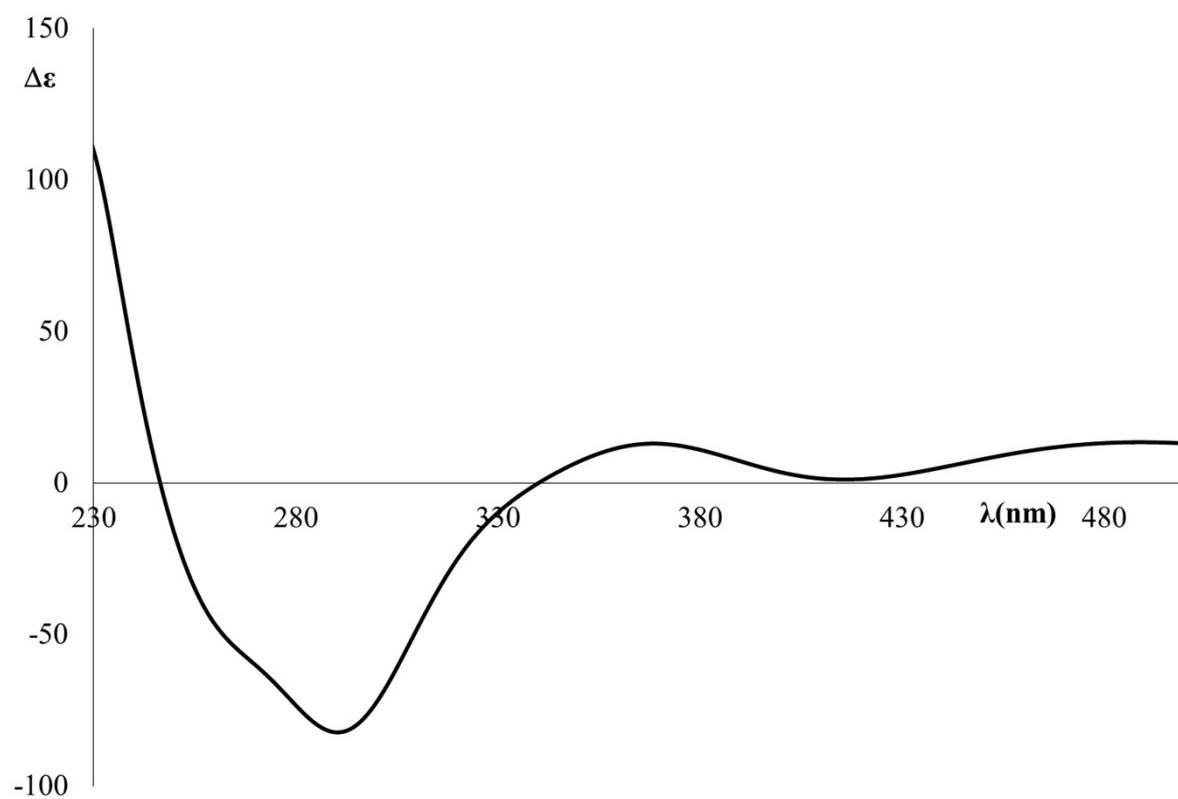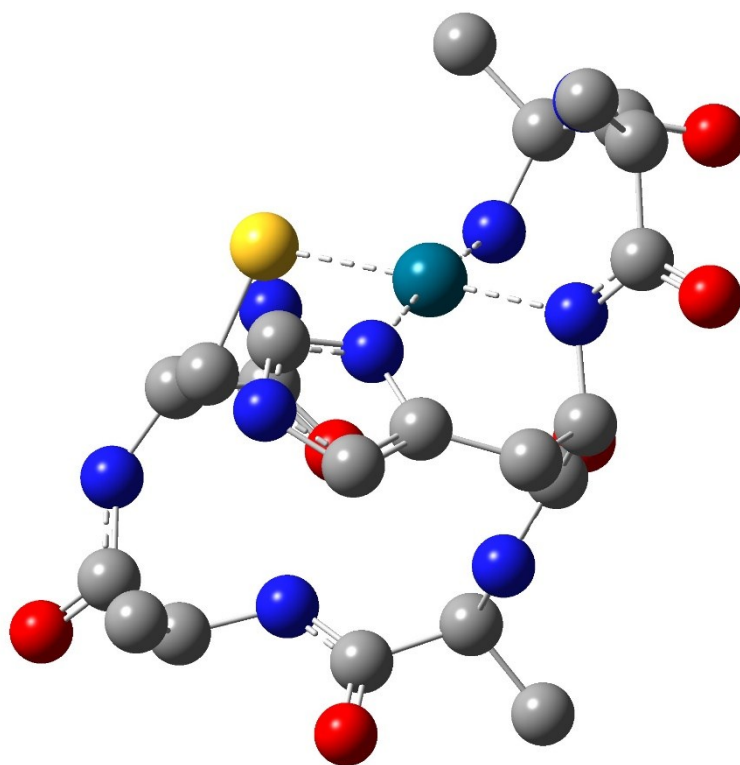

*N(3) coordination*

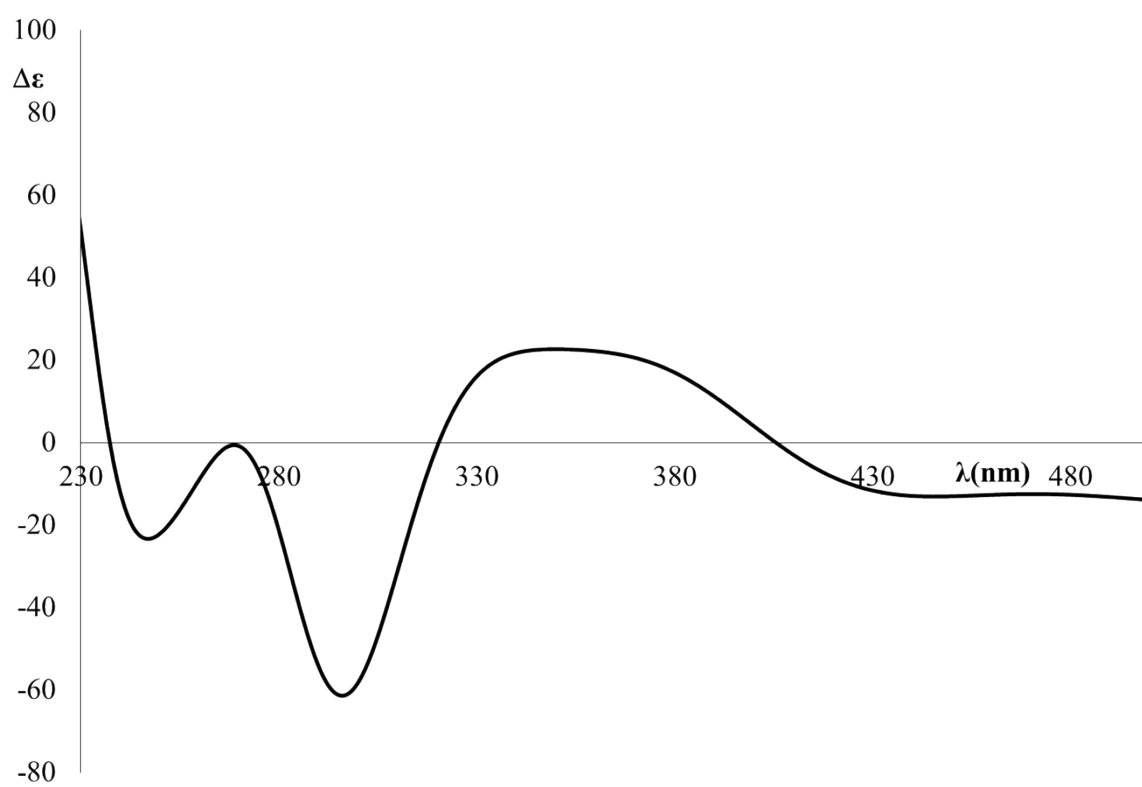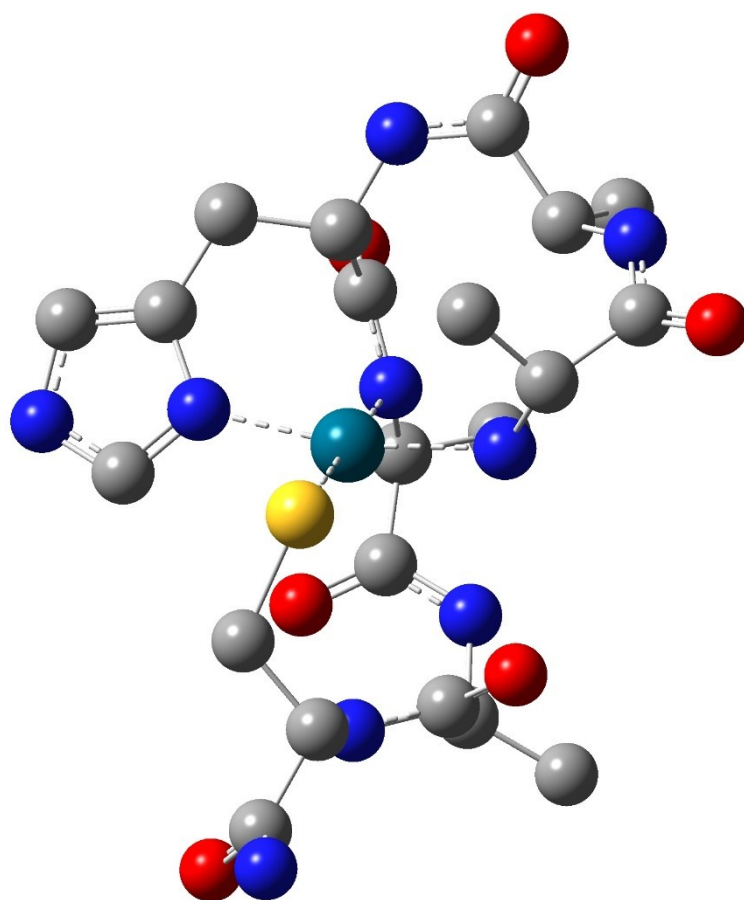

*N(4) coordination*

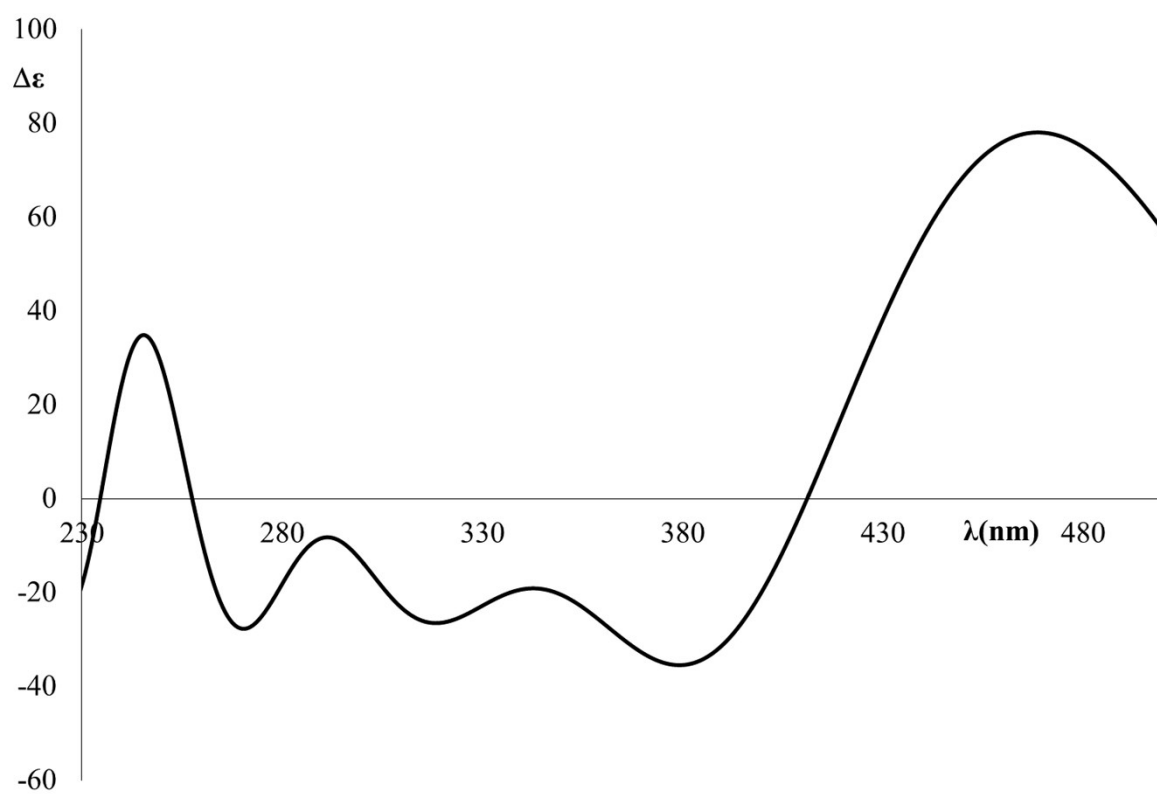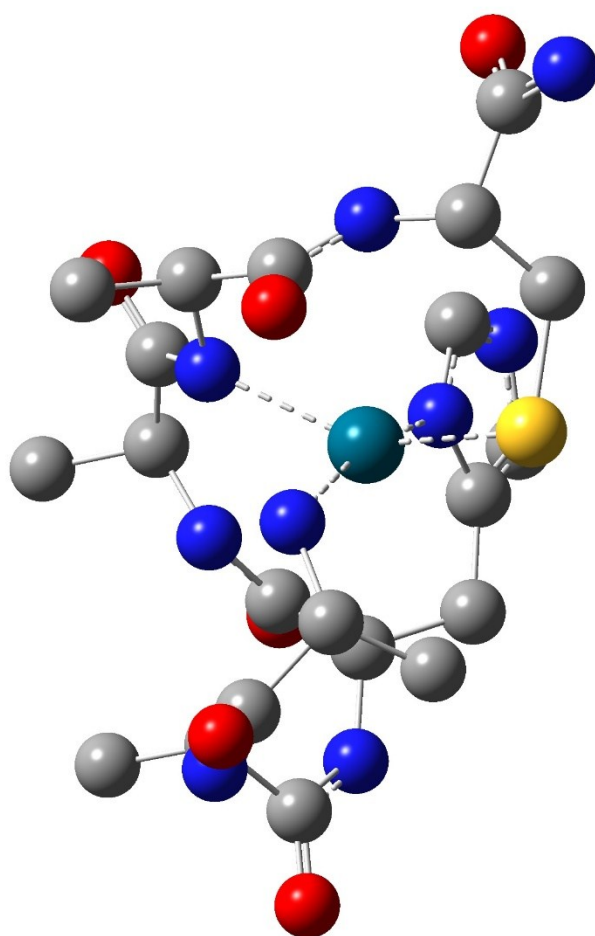

*N(5) coordination*

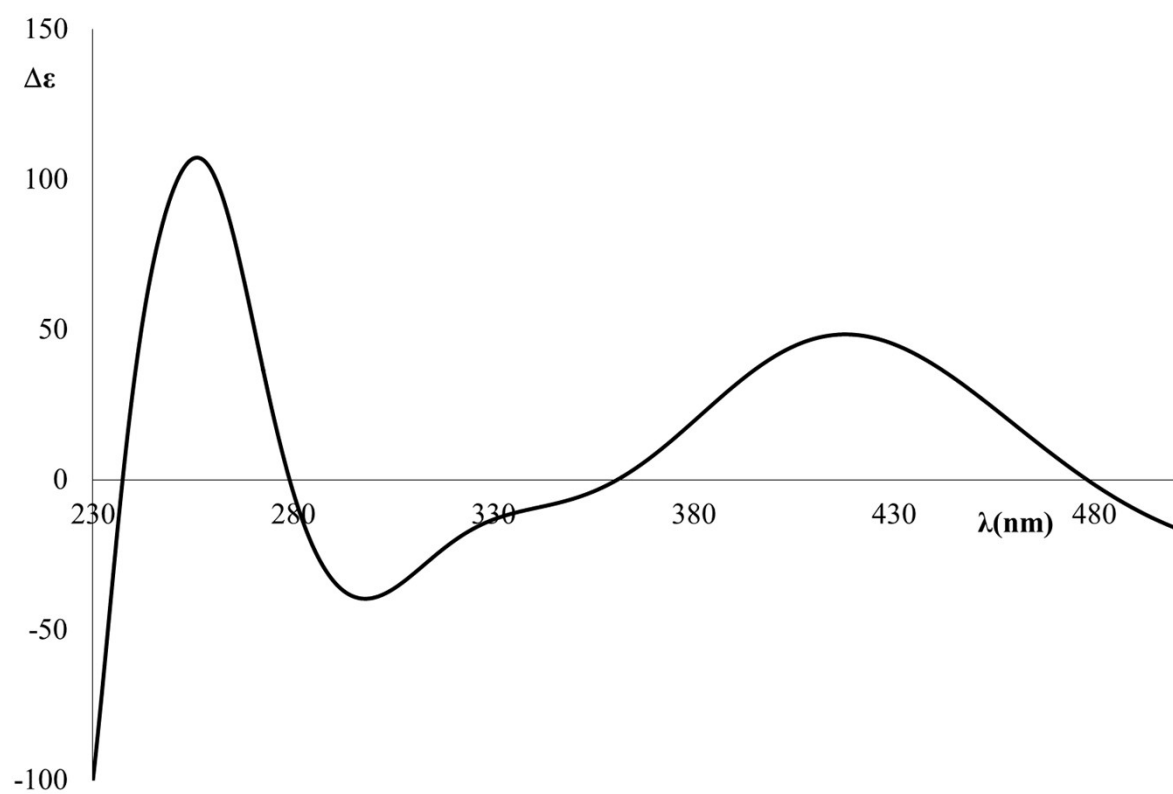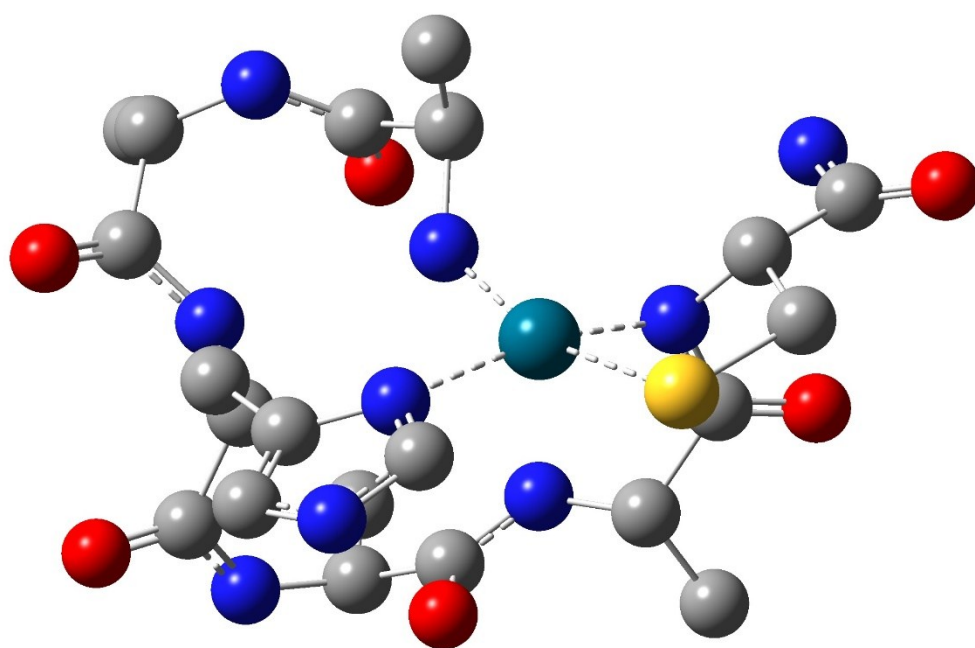

**Figure S3.** EPR spectra of Cu(II):AHAAC-NH<sub>2</sub> 1:1 at pH 7.93.

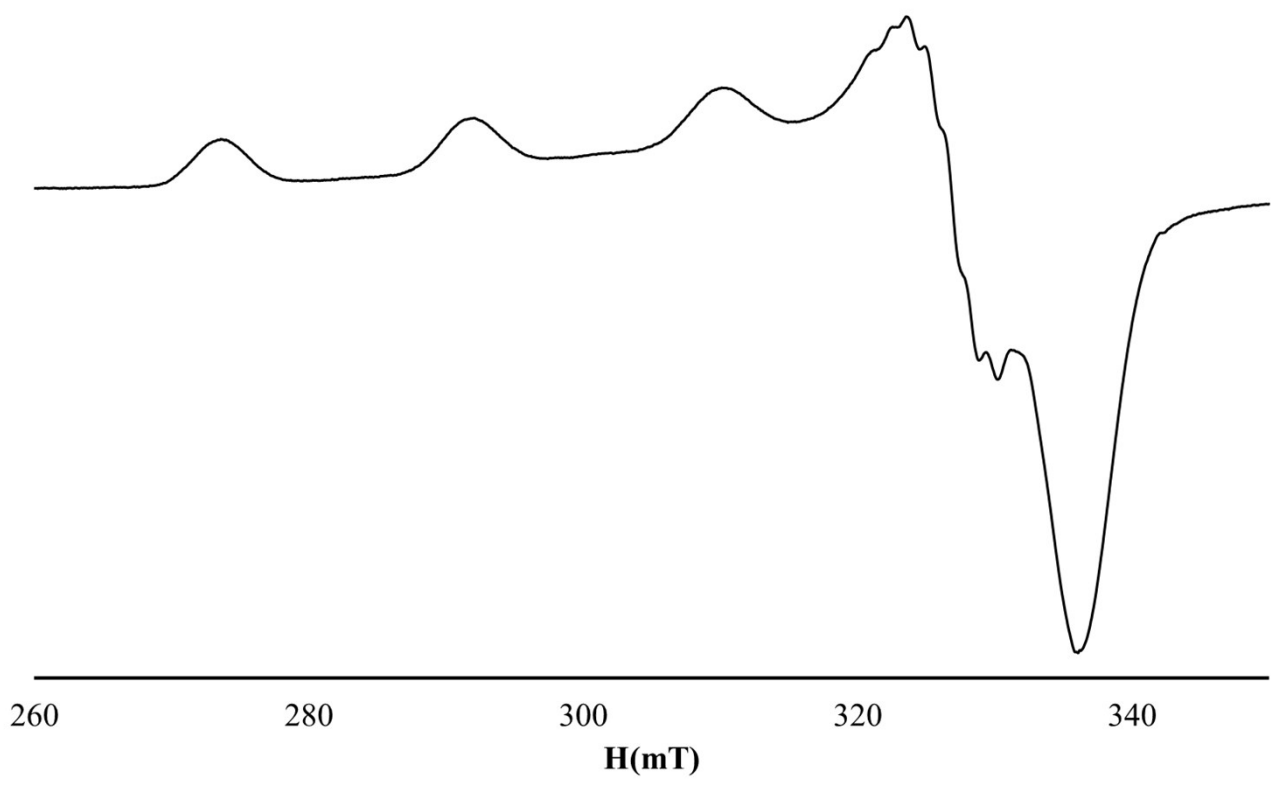



**Figure S4.** Concentration distribution curve of the complexes formed in the Pd(II):AHAAAC-NH<sub>2</sub> 1:1 system. The stepwise protonation constants are also marked.  $c_L = 2$  mM.

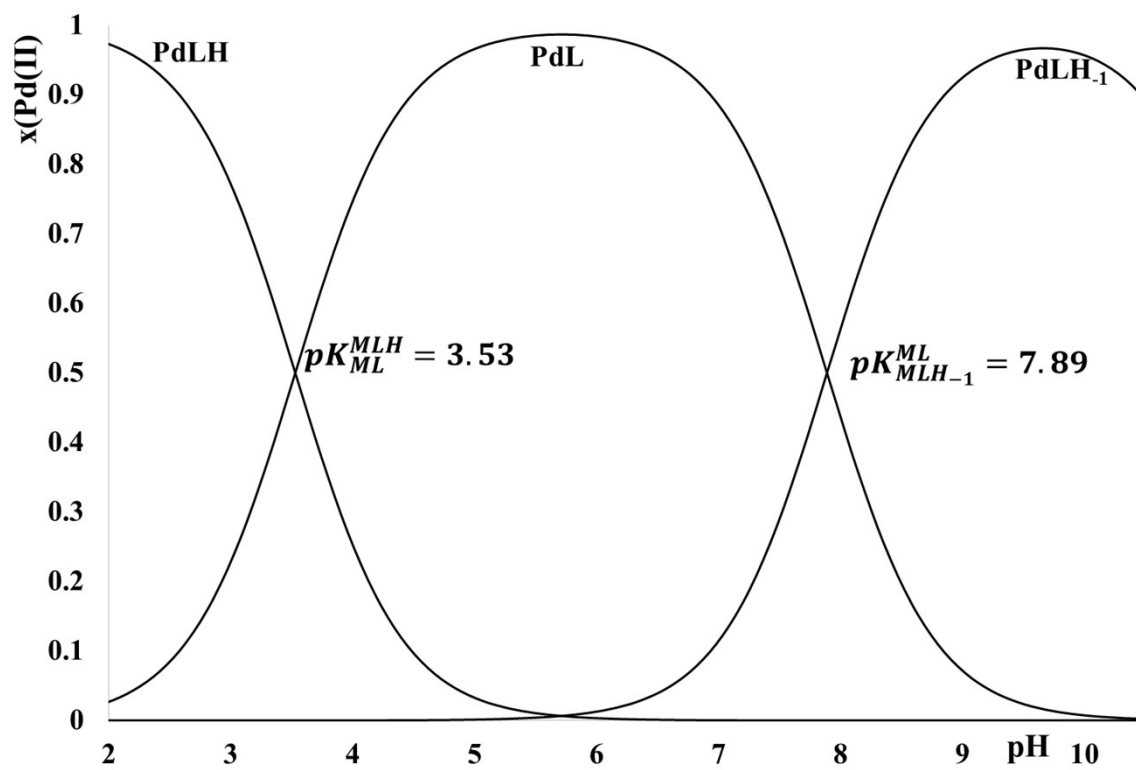

**Figure S5.** pH-dependent CD spectra recorded in the Pd(II):AHAAAC-NH<sub>2</sub> 1:1 system.

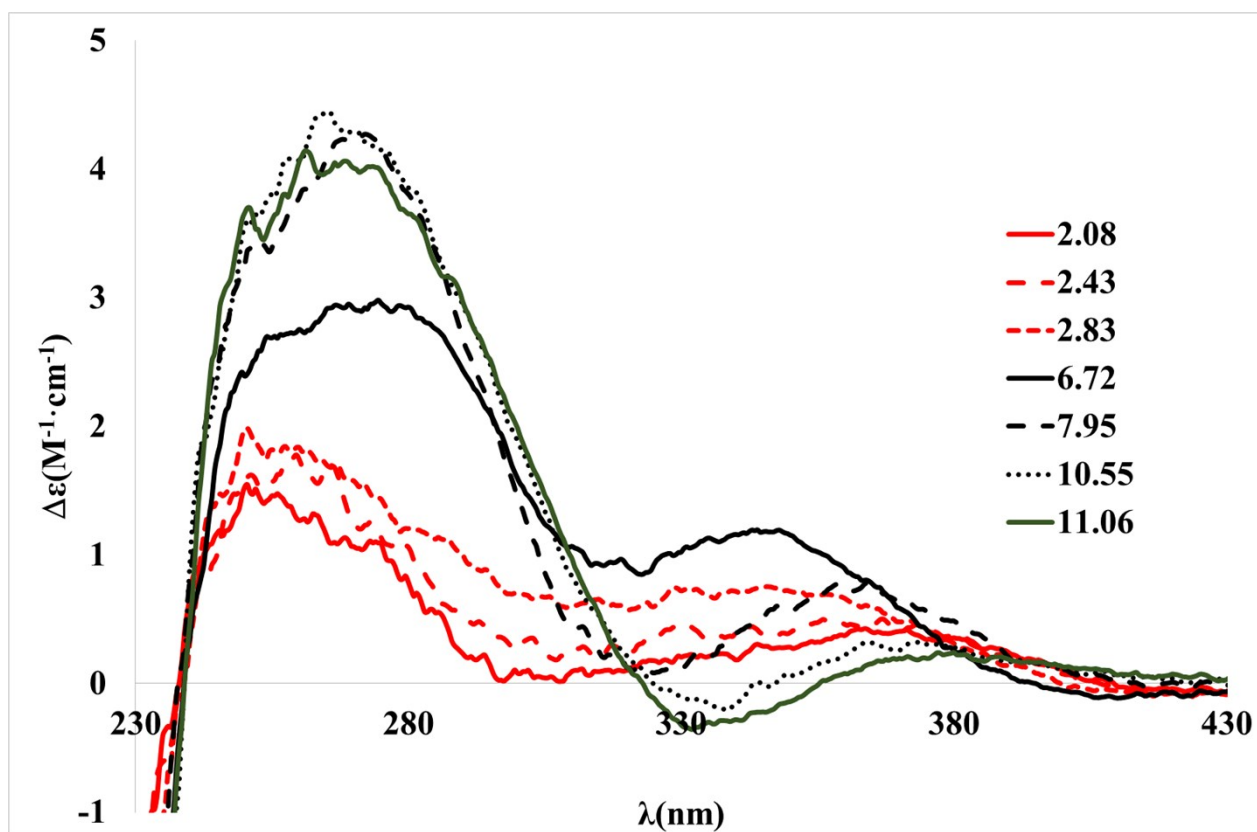

**Figure S6.** Calculated ECD spectrum of the MLH<sub>1</sub> complex formed in the Pd(II):AHAAAC-NH<sub>2</sub> system.

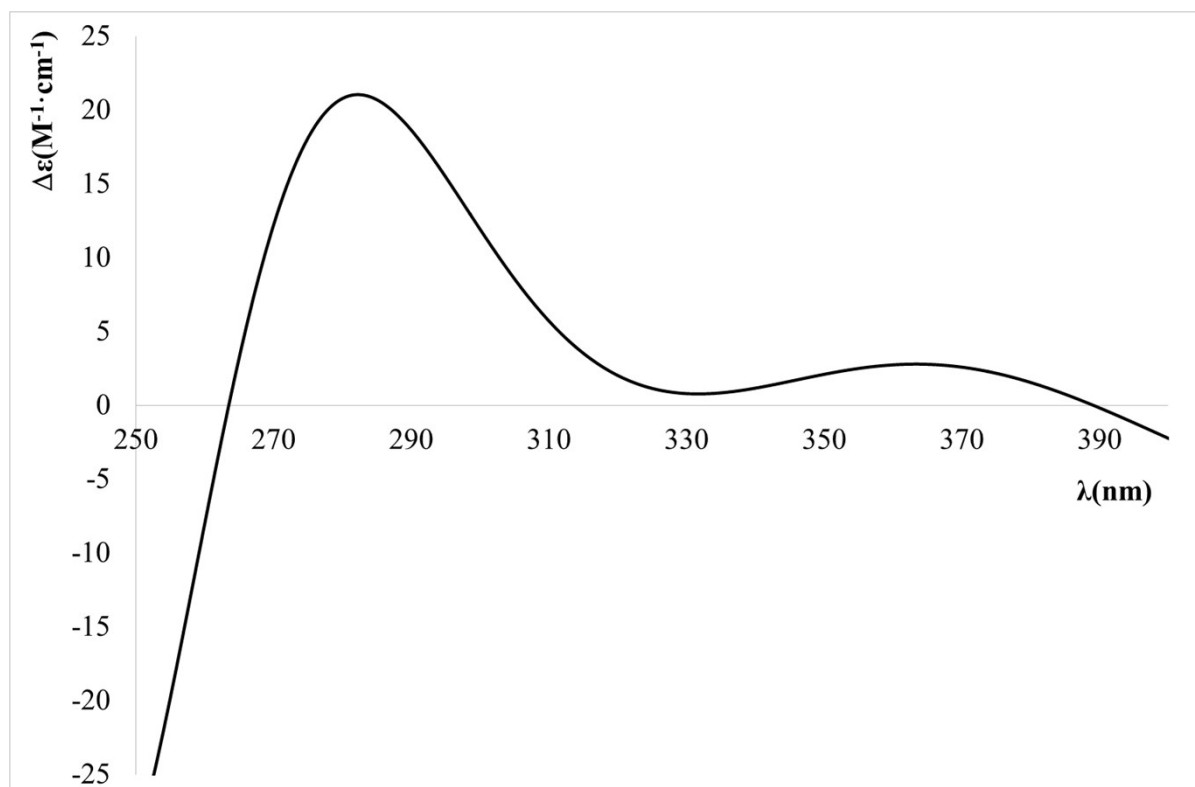

Supplement: c6nj03735f1.pdf [file c6nj03735f1.pdf]
